1  
2  
3  
4  
5  
6  
7  
8  
9  
10  
11  
12  
13  
14  
15  
16  
17  
18  
19  
20  
21  
22

# Evolution of the latitudinal diversity gradient in the hyperdiverse ant genus *Pheidole*

Evan P. Economo<sup>1,2\*</sup>, Jen-Pan Huang<sup>2</sup>, Georg Fischer<sup>1</sup>, Eli M. Sarnat<sup>1</sup>, Nitish Narula<sup>1</sup>, Milan Janda<sup>3,4</sup>, Benoit Guénard<sup>5</sup>, John T. Longino<sup>6</sup>, L. Lacey Knowles<sup>2</sup>

\*correspondence: Evan P. Economo, [evaneconomo@gmail.com](mailto:evaneconomo@gmail.com)

<sup>1</sup>*Okinawa Institute of Science and Technology Graduate University, Onna, Okinawa, Japan, 904-0495*

<sup>2</sup>*Department of Ecology & Evolutionary Biology, Museum of Zoology, University of Michigan, USA*

<sup>3</sup>*National Laboratory for Ecological Analysis and Synthesis (LANASE), ENES, UNAM, Morelia, Mexico*

<sup>4</sup>*Biology Centre of Czech Academy of Sciences, Ceske Budejovice, Czech Republic*

<sup>5</sup>*The University of Hong Kong, School of Biological Sciences, Hong Kong, SAR, China.*

<sup>6</sup>*Department of Biology, University of Utah, USA*

23

24

25 **Running title:** Evolution of tropical hyperdiversity in ants

26

## 27 **ABSTRACT**

28

### 29 **Aim**

30 The latitudinal diversity gradient is the dominant pattern of life on Earth, but a consensus  
31 understanding of its origins has remained elusive. The analysis of recently diverged, hyper-  
32 rich invertebrate groups provides an opportunity to investigate latitudinal patterns with the  
33 statistical power of large trees while minimizing potentially confounding variation in ecology  
34 and history. Here, we synthesize global phylogenetic and macroecological data on a  
35 hyperdiverse (>1100 species) ant radiation, *Pheidole*, and evaluate the roles of three general  
36 explanations for the latitudinal gradient: variation in diversification rate, tropical  
37 conservatism, and ecological regulation.

38

### 39 **Location**

40 Global.

41

### 42 **Time Period**

43 The past 35 million years.

44

### 45 **Major taxa studied**

46 The hyperdiverse ant genus *Pheidole* Westwood.

47

### 48 **Methods**

49 We assembled geographic data for 1499 species and morphospecies, and inferred a dated  
50 phylogeny of *Pheidole* of 449 species, including 150 species newly sequenced for this study.  
51 We tested correlations between diversification rate and latitude with BAMM, HiSSE,  
52 GeoSSE, and FiSSE, and examined patterns of diversification as *Pheidole* spread around the  
53 globe.

54

### 55 **Results**

56 We found that *Pheidole* diversification occurred in series of bursts when new continents were  
57 colonized, followed by a slowdown in each region. There was no evidence of systematic  
58 variation of net diversification rates with latitude across any of the methods. Additionally, we  
59 found latitudinal affinity is moderately conserved with a Neotropical ancestor and  
60 phylogenetic inertia alone is sufficient to produce the gradient pattern.

61

## 62 **Main Conclusions**

63 Overall our results are consistent with tropical conservatism explaining the diversity gradient,  
64 while providing no evidence that diversification rate varies systematically with latitude.  
65 There is evidence of ecological regulation on continental scales through the pattern of  
66 diversification after colonization. These results shed light on the mechanisms underlying the  
67 diversity gradient, while contributing toward a much-needed invertebrate perspective on  
68 global biodiversity dynamics.

69

70 **Keywords:** ants, latitudinal diversity gradient, tropical conservatism, diversification rate,  
71 diversity regulation, macroevolution

72

73

74  
75  
76  
77  
78  
79  
80  
81  
82  
83  
84  
85  
86  
87  
88  
89  
90  
91  
92  
93  
94  
95  
96  
97  
98  
99  
100  
101  
102  
103  
104  
105  
106  
107  
108

## INTRODUCTION

Understanding how ecological and evolutionary processes interact with historical factors to shape global biodiversity patterns remains a major goal of biology. The latitudinal diversity gradient (LDG) is the most general biogeographic pattern, yet we still lack a consensus understanding of its mechanisms (Pianka, 1966; Willig *et al.*, 2003; Mittelbach *et al.*, 2007; Fine, 2015). This is likely because many biological, physical, and historical factors that could plausibly affect diversity vary systematically with latitude, and thus a large number of hypotheses have been developed to explain the pattern. However, testing the predictions of different hypotheses empirically and evaluating their relative merits has proven to be a challenge.

Recently, the synthesis of large-scale geographic datasets along with large-scale phylogenetic data has provided new opportunities for empirical evaluation of hypotheses for the mechanisms underlying the LDG. These tests have mainly focused on vertebrates (e.g. Cardillo *et al.*, 2005; Weir & Schluter, 2007; Jetz *et al.*, 2012; Pyron & Wiens, 2013; Rolland *et al.*, 2014; Duchêne & Cardillo, 2015; Siqueira *et al.* 2016; Pigot *et al.*, 2016) and woody plants (Kerkhoff *et al.*, 2014), since those are the taxa with large-scale comprehensive data available. Several pioneering studies have examined latitudinal diversification patterns in insects (e.g. McKenna & Farrell, 2006; Hawkins & DeVries, 2009; Condamine *et al.*, 2012; Moreau & Bell, 2013; Pie, 2016; Owens *et al.*, 2017) although data-deficiency of most invertebrate groups makes taxonomic and/or geographic scope a problem for analysis.

Among invertebrates, ants are emerging as an exemplar taxon for global biodiversity studies. Ants are ecologically dominant in most terrestrial ecosystems and are, for an insect group, relatively well documented scientifically. Moreover, their diversity is high, but not intractably so, with richness on the same order as major vertebrate groups (~15,000 described ant species), and exhibit a marked latitudinal gradient (Kaspari *et al.*, 2004; Dunn *et al.*, 2009). Recently, a new comprehensive dataset was compiled which gives the known geographic distribution of all described ant species across >400 geographic regions around the globe (Guénard *et al.*, 2017). These data, combined with progress toward reconstructing the ant tree of life (Brady *et al.*, 2006; Moreau *et al.*, 2006; Moreau & Bell, 2013; Ward *et al.*, 2015), allow for inferences of the evolutionary underpinnings of large-scale diversity patterns in ants.

Here, we use globally distributed, hyperdiverse (>1100 described species) ant genus

109 *Pheidole* as a model taxon to test hypotheses for the latitudinal diversity gradient. While over  
110 a hundred hypotheses have been proposed to explain the gradient (Willig *et al.*, 2003;  
111 Mittelbach *et al.*, 2007; Fine, 2015), these can roughly be sorted under three umbrella  
112 hypotheses which we use to frame our study: i) the *Diversification Rate hypothesis* (DRH), ii)  
113 the *Tropical Conservatism Hypothesis* (TCH), and iii) the *Ecological Regulation Hypothesis*  
114 (ERH).

115 First, the *Diversification Rate Hypothesis* posits that there is some causal factor that  
116 affects speciation and/or extinction rates and varies with latitude (e.g. reviewed in Pianka,  
117 1966; Mittelbach *et al.*, 2007; Fine, 2015). This leads to a latitudinal disparity in species  
118 accumulation rate that underlies the gradient, rather than any regulation of total species  
119 numbers. Many such potential causal factors have been proposed. For example, temperature  
120 may affect mutation rates, which in turn could affect the rates of evolution of reproductive  
121 incompatibilities (Rohde, 1992). Such hypotheses about speciation contribute to the idea that  
122 faster origination in the tropics and dispersal outward lead to differential accumulation rates  
123 across latitude: the “out of the tropics” model (Jablonski *et al.*, 2006). Or, extinction rates  
124 could be higher in the temperate than tropical zone due to greater climatic variability (Weir &  
125 Schluter, 2007; Rolland *et al.*, 2014). The prediction of the DRH is straightforward: net  
126 diversification rate inferred from a phylogeny should be higher in tropical lineages compared  
127 with extratropical lineages.

128 Second, the *Tropical Conservatism Hypothesis* (TCH) (Pianka, 1966; Wiens &  
129 Donoghue, 2004) posits that the relative youth of colder temperate biomes combined with the  
130 inertia of phylogenetic niche conservatism (Wiens & Graham, 2005; Losos, 2008) has limited  
131 the accumulation of diversity in the temperate zone. In this scenario, net diversification rates  
132 do not necessarily vary with latitude, and the difference in richness is mainly due to time for  
133 diversification (Stephens & Wiens, 2003). This idea is based on the fact that historically the  
134 Earth has been much warmer than it is now, and much of what is now the temperate zone was  
135 covered by “megathermal” biomes. This hypothesis is supported by the fossil record; many  
136 lineages that used to occur in the Palearctic are now limited to tropical latitudes. This is true  
137 for ants as well; the Baltic amber ant fauna from the late Eocene has greater affinity to  
138 modern Indo-Australian faunas than modern Palearctic faunas (Guénard *et al.*, 2015). The  
139 main prediction of this hypothesis is that the ancestral region of most groups is the tropics,  
140 transitions out of the tropical zone are rare, and thus the temperate clades are younger and  
141 nested within tropical clades. The fact that transition from the tropical to the temperate zones  
142 should be difficult because of the many nontrivial adaptations that ectothermal organisms

143 such as ants need to overwinter in the higher latitudes. One additional key prediction of the  
144 TCH is that temperate diversification matches the timing of global cooling: specifically, that  
145 diversification of cold-adapted lineages accelerated after the Oligocene cooling 34mya.

146 Finally, the *Ecological Regulation Hypothesis* (ERH) posits that, due to some causal  
147 factor that varies with latitude, more species can coexist locally and regionally in tropical  
148 ecosystems than in temperate ecosystems. In this case, diversity is saturated at or near some  
149 ecological limit, and this “carrying capacity” of species varies with latitude regulating  
150 diversity from the top-down (Rabosky & Hurlbert, 2015). This is perhaps due to limitations  
151 on species coexistence that are driven by productivity or other factors (Pianka, 1966; Hurlbert  
152 & Stegen, 2014b). Speciation and extinction rates may vary over time to regulate richness at  
153 the requisite quota for a geographic region, but are not causally responsible for the disparity  
154 in diversity. Likewise, latitudinal affinity may be highly conserved or evolve quickly, but it  
155 would be immaterial to the origins of the gradient if diversity is regulated at levels that vary  
156 with latitude.

157 In a parallel study, Economo et al. (In Press) examined latitudinal patterns across 262  
158 ant clades and tested hypotheses for the latitudinal gradient. That taxon-wide analysis focused  
159 on deeper timescales, and lacks phylogenetic resolution within recent radiations. They found  
160 that tropical lineages are more ancient than extratropical lineages, which mainly arose since  
161 the Oligocene cooling (past 34my), consistent with the TCH. Further, they found that  
162 diversification rate is highly heterogeneous but uncorrelated with latitude among ant clades,  
163 inconsistent with the DRH. Due to the limitations of phylogenetic data at such broad scales,  
164 they could not explicitly test for ecological regulation (ERH).

165 As with other studies on broad taxonomic scales (e.g. birds: Jetz *et al.*, 2012,  
166 mammals: Buckley & Jetz, 2007; Rolland *et al.*, 2014), the analyses across all ants provide  
167 the advantages of the statistical power of large numbers and a deep-time perspective.  
168 However, as many ecological, functional trait, and historical factors could contribute to  
169 variation in macroevolutionary rates at these deeper phylogenetic scales, this variation among  
170 clades may obscure underlying latitudinal effects that could be detectable among more  
171 similar, closely related lineages. For example, ant diversification has been shown to be  
172 related to functional traits (Blanchard & Moreau, 2017). Moreover, latitudinal gradients are  
173 often present within individual clades that evolved recently (Economo *et al.*, 2015a), and  
174 macrophylogenetic studies may miss the relevant scale of variation. Thus, the analysis of  
175 closely related lineages within younger, hyper-rich radiations provides a necessary  
176 complement to large-scale taxon-wide studies. In highly diverse groups, these radiations can

177 provide both the statistical power of large numbers, while controlling to some degree for  
178 differences in ecology, functional traits, and historical factors.

179         The global radiation of *Pheidole* arose entirely since the Oligocene cooling (last  
180 34my), during which time it has evolved a latitudinal gradient echoing the pattern for all ants  
181 (Economo *et al.*, 2015a). Thus, *Pheidole* presents an opportunity to examine diversification  
182 dynamics in this most recent period since the Oligocene, a period where many ant lineages  
183 transitioned out of the tropics, complementing the deeper timescales of the ant-wide study.  
184 While the low number of older extratropical ant lineages is consistent with the TCH  
185 (Economo, In Press), there is still an open question of whether niche conservatism or  
186 diversification rate differences explain the emergence of the gradient since the Oligocene.  
187 According to the TCH, the tropical ancestry of *Pheidole* combined with phylogenetic niche  
188 conservatism is sufficient to explain why there are more species in the tropics. The DRH  
189 predicts that *Pheidole* diversified more rapidly in the tropics, and this explains the disparity in  
190 diversity. Finally, we examine whether there is evidence for ecological limits to *Pheidole*  
191 diversification (ERH) by examining whether the radiation is undergoing pulse-like bursts of  
192 diversification. If so, we would expect a series of diversification pulses followed by  
193 slowdowns as the genus colonized different regions around the globe.

194         Here, we reconstruct a new global *Pheidole* phylogeny—the most comprehensive to  
195 date—increasing substantially the taxonomic and geographic coverage from previous studies  
196 of the genus (Moreau, 2008; Sarnat & Moreau, 2011; Economo *et al.*, 2015a; Economo *et al.*,  
197 2015b). We use the new phylogeny and geographic data from the GABI database to test  
198 predictions of the three umbrella hypotheses for the latitudinal gradient. There is no  
199 biological reason why two or more of these mechanisms cannot be simultaneously operating  
200 (e.g. diversity can be regulated and speciation rate can vary systematically with latitude, or  
201 niche conservatism can occur along with diversity regulation). Thus, our goal is to rule out  
202 hypotheses rather than isolate a single exclusive answer. The analysis of this famously  
203 hyperdiverse radiation will advance our general understanding of the latitudinal gradient, the  
204 most pervasive pattern of life on Earth.

205

## 206 **METHODS**

207

### 208 **Geographic Data**

209 Our geographic data are based primarily on the Global Ant Biodiversity Informatics Project  
210 (GABI) database (Guénard *et al.*, 2017) which can be viewed through the website



211 *antmaps.org* (Janicki *et al.*, 2016), and secondarily on the personal collection records of the  
212 authors. The former focuses on described species, while the second was used to supplement  
213 data on morphospecies for taxa included in the phylogenetic analysis.

214

### 215 **Phylogeny reconstruction**

216 *Taxon Selection:* Compared with many other large ant radiations, the effort to reconstruct the  
217 phylogenetic history of *Pheidole* is relatively far along. A series of studies, beginning with  
218 Moreau 2008 (Moreau, 2008) and followed by other studies (Sarnat & Moreau, 2011;  
219 Economo *et al.*, 2015a; Economo *et al.*, 2015b) has produced a broad picture of the  
220 evolutionary history of the genus. However, for the purposes of understanding geographic  
221 patterns of diversification, having a larger, and more proportionally sampled phylogeny will  
222 provide additional statistical power and more robust results. Thus, we continued sampling  
223 *Pheidole* taxa for sequencing, focusing on sampling more taxa from the Neotropics,  
224 Madagascar, and SE Asia, which had been undersampled in previous analyses. In all, we  
225 increased the number of species from 282 taxa in the most recent global *Pheidole* phylogeny  
226 (Economo *et al.*, 2015a) to 449 taxa in the current contribution (Table S2).

227

228 *Estimation of Sampling Completeness:* One source of uncertainty in large-scale analyses of  
229 diversity is bias in taxonomic completeness overall and among different areas, particularly in  
230 relatively poorly known groups such as insects. While there is still a pronounced latitudinal  
231 gradient in *Pheidole* even among described species, there are undoubtedly many undescribed  
232 species in the genus, and it is probable they are disproportionately found in the tropics. While  
233 accounting for unobserved species is a challenge in any analysis, we devised an approximate  
234 method to calculate sampling completeness across areas given the information in hand, and  
235 use these estimates in our analysis of diversification rate. The details of our calculation are in  
236 the Supporting Information.

237

238 *DNA Sequencing:* Previous molecular work on *Pheidole* has generated a dataset based on  
239 eight nuclear loci [His3.3B (histone H3.3B F1 copy), Lop1 (long wavelength sensitive opsin  
240 1), GRIK2 (glutamate receptor ionotropic, kainate 2-like), unc\_4 (unc-4 homeodomain gene),  
241 LOC15 (uncharacterized locus LOC15), CAD (carbomoylphosphate synthase), EF-1 $\alpha$  F2  
242 (elongation factor 1-alpha F2), Top1 (DNA topoisomerase 1)], and one mitochondrial locus  
243 [CO1 (cytochrome oxidase 1)]. In a previous study (Economo *et al.* 2015a), all 9 loci were  
244 sequenced for a subset of 65 taxa representing the main *Pheidole* lineages around the world,



245 while three loci (COI, Lop1, and His3.3B) were sequenced for all taxa to fill out the clades  
246 (217 taxa). This hierarchically redundant sampling design was chosen for reasons cost and  
247 time efficiency and to maximize the number of taxa, combined with the fact that many of the  
248 slow-evolving nuclear genes provide less information on recent divergences.

249 We added 167 new *Pheidole* taxa to this existing dataset by extending this sampling  
250 design and sequencing COI, Lop1, and His3.3B. We did not plan to sequence all 9 loci unless  
251 we found novel divergent clades not represented by taxa with all 9 genes sequenced in the  
252 earlier study (and we did not). Ant samples from field collections fixed in 95% EtOH were  
253 extracted for DNAs using DNeasy Blood & Tissue Kit (Qiagen, Hilden, Germany). The  
254 whole ant body was incubated in the extraction buffer without grinding during the first step,  
255 and then the complete ant specimen was removed before filtering and cleaning the extracts  
256 via a provided column. Extracted DNAs were subsequently used for PCR reactions for one  
257 mitochondrial (CO1) (Folmer *et al.*, 1994) and two nuclear (His3.3B and Lop1) regions. Each  
258 reaction contained 0.5 ul of extracted DNA, 1ul of 10 × buffer, 0.75 ul of MgCl<sub>2</sub>, 0.5 ul of  
259 10mM dNTPs, 0.2 ul of 1% BSA, 0.4ul of of each primer, 0.04ul of Tag DNA polymerase  
260 (Invitrogen, USA), and ddH<sub>2</sub>O to make a total of 10 ul reaction. Standard PCR procedures  
261 were employed with annealing temperatures of 52, 60, and 60 C for CO1, His3.3B, and Lop1  
262 regions, respectively. The amplicons were sequenced via a ABI<sup>3700</sup> machine by the  
263 Sequencing Core at the University of Michigan. Sequences were checked using SeqMan  
264 (DNASStar Inc., USA).

265  
266 *Phylogenetic tree inference:* We used Bayesian methods to infer a dated *Pheidole* phylogeny  
267 including 449 ingroup taxa (Table S2). To generate codon-aware alignments for these loci,  
268 we first searched NCBI's non-redundant CDS database (Clark *et al.*, 2016) for reliable amino  
269 acid sequences for all loci and retrieved such sequences for seven of the nine loci with the  
270 following accession numbers: AIM2284.1 (CAD), ABW70333.1(CO1), EZA53539.1 (EF-1α  
271 F2), EGI60526.1 (His3.3B), ABW36758.1 (Lop1), EGI59282.1 (unc-4), and AIM43286.1  
272 (Top1). These sequences were used as references for generating codon-aware alignments.  
273 The CAD, unc-4, and Top1 alignments generated using MAFFT v7.205 (Katoh & Standley,  
274 2013) (--retree 4; --maxiterate 1000) showed no frameshift mutations and/or insertions and  
275 deletions. However, the CO1, EF-1α F2, His3.3B, and Lop1 alignments did not match the  
276 reference sequences, showing disruptions in the translated amino acid alignments (such as the  
277 presence of numerous stop codons). For these loci, we used a codon-aware alignment  
278 software, MACSE v1.01b (Ranwez *et al.*, 2011), to generate the alignments. Reverse

279 translations of the reliable amino acid reference sequences, accounting for all possibilities at  
280 each codon position, were passed as reliable input sequences to the software, we were able to  
281 assign codon positions within the exons in these seven loci. The resulting alignments were  
282 manually inspected and cleaned using Geneious R8 software. Furthermore, we identified,  
283 extracted, and separately aligned intronic regions wherever necessary. The remaining two  
284 loci, LOC15 and GRIK-2, were aligned using MAFFT. We concatenated all nine alignments  
285 and once again manually cleaned the master alignment, resulting in an alignment containing  
286 8839 sites.

287 We used PartitionFinder v1.1.1 (Lanfear *et al.*, 2012) to determine the partitioning  
288 scheme and corresponding models of molecular evolution. The model scope included HKY,  
289 HKY+ $\Gamma$ , SYM, SYM+ $\Gamma$ , GTR, GTR+ $\Gamma$ , TrN, TrN+ $\Gamma$ , K80, K80+ $\Gamma$ , TrNef, TrNef+ $\Gamma$ , JC, and  
290 JC+ $\Gamma$ , branch lengths were set to ‘linked’, and model selection and comparison was set to  
291 Bayesian Information Criterion (BIC). PartitionFinder identified an optimal scheme  
292 containing 16 partitions (Table S3). We used ClockstaR (Duchene *et al.*, 2014) to determine  
293 the optimal number of clock models across our partitions for relaxed-clock phylogenetics,  
294 and a single linked clock was preferred based on the SEMmax criterion.

295 Our primary phylogenetic inference was conducted in BEAST2 v2.1.3 (Bouckaert *et*  
296 *al.*, 2014), but we first performed maximum likelihood (ML) reconstruction in RAxML  
297 v8.0.25 (Stamatakis, 2014). Using the partitioning scheme described above and the GTR+ $\Gamma$   
298 model, we ran 75 ML inferences with 1000 bootstraps to find the ML tree. Using the *chronos*  
299 function in the *ape* package in R (Paradis *et al.*, 2004), we scaled the tree by calibrating the  
300 root node to a range of 50-60my. This tree was used as the starting tree for the BEAST2  
301 analyses, but the topology was not fixed.

302 Unfortunately there are no reliable fossil calibrations available to date nodes *within*  
303 the genus. Thus, the age of the group can only be informed by the age of the stem node and  
304 information from fossils in related taxa across the subfamily Myrmicinae. Thus, because our  
305 analysis is concentrated within *Pheidole*, we preferred to use the stem node age distribution  
306 (i.e. the most recent common ancestor of *Pheidole* and its sister lineage  
307 *Cephalotes+Procryptocerus*) inferred as in a much larger analysis of the subfamily  
308 Myrmicinae (Ward *et al.*, 2015) that could make use of a broad range of molecular and fossil  
309 data to date the ages. Following those results, the stem node calibration was set to a normal  
310 distribution (mean: 58.0 mya, sigma, 4.8my) to match results from that study. Future work  
311 analyzing the global fossil record in *Pheidole* and placing fossil taxa within the *Pheidole* tree  
312 represents an important avenue for future phylogenetic work on the genus. Despite this

313 limitation, the analyses in this paper depend mostly on relative, rather than absolute ages, and  
314 we draw no conclusions based on the precise timing of nodes in the tree.

315 We used a relaxed lognormal clock model linked across partitions (due to ClockstaR  
316 results), and used the partitioning scheme and models identified with PartitionFinder. Six  
317 independent analyses were run and chains were stopped between 45 and 80 million  
318 generations, after we observed convergence using Tracer software v1.6.0 (Rambaut 2014).  
319 We discarded the leading 33% of saved states as burnin, combined the remaining trees from  
320 all runs to create the posterior set, and generated the Maximum Clade Credibility tree and  
321 nodes set to median height. After pruning the outgroup, this tree was used for all subsequent  
322 analyses.

323

### 324 **Macroevolutionary rate inference**

325 We took several complimentary approaches to estimating macroevolutionary rates and  
326 potential dependencies on latitude, primarily basing our analysis on BAMM (Bayesian  
327 Analysis of Macroevolutionary Mixtures, Rabosky, 2014), HiSSE (Hidden State Speciation  
328 and Extinction, Beaulieu & O'Meara, 2016), and FiSSE (Rabosky & Goldberg, 2017), with a  
329 secondary analysis using GeoSSE (Geographic State Speciation and Extinction, Goldberg *et*  
330 *al.*, 2011). These methods each have their strengths and weaknesses thus our approach is to  
331 use them collectively to seek conclusions about our data that are robust to methodological  
332 assumptions and implementation.

333 The main advantage of BAMM is that complex mixture models can be assessed with  
334 rate shifts across the tree, including accelerating and decelerating diversification rates. While  
335 trait-dependent diversification models are not fit directly, trait-diversification correlations can  
336 be assessed *post hoc* using structured rate permutations that estimate correlations while  
337 accounting for phylogenetic dependency (Rabosky & Huang, 2015). We use BAMM to test  
338 for correlations between latitude and net diversification rate, and evaluate evidence of  
339 decelerating diversification (ecological regulation of diversity) overall and in relation to the  
340 colonization of continents.

341 While BAMM has strengths in inferring complex mixtures of diversification  
342 processes, they are not explicitly trait-dependent, and the SSE family of methods explicitly  
343 fits models of trait-dependent diversification. SSE methods have been developed with  
344 different kinds of trait data, either based on binary traits (BISSE, Maddison *et al.*, 2007),  
345 continuous traits (QuaSSE, FitzJohn, 2010), or explicitly geographic traits (GeoSSE,  
346 Goldberg *et al.*, 2011). While these methods are explicitly for inferring trait-dependent

347 speciation and extinction, they have the problem that differences in the focal trait are the only  
348 mechanisms that can cause shifts in macroevolutionary rates. If the real process has complex  
349 rate shifts then a more complex trait dependent model may fit better than a homogeneous null  
350 model, even if the shifts are not related to the traits per se, leading to type-I errors (Rabosky  
351 & Goldberg, 2015). These problems are at least partially solved by HiSSE (Beaulieu &  
352 O'Meara, 2016), a method that fits binary trait-dependent speciation and extinction models  
353 that can be formally tested against similarly complex trait-independent models. We thus  
354 primarily used HiSSE for our analysis. Since GeoSSE has been implemented for explicitly  
355 geographic dynamics, we also fit that model as a secondary test and present that analysis in  
356 the supplement.

357 Finally, as an additional test for variation in speciation rate with latitude, we used a  
358 non-parametric method, FiSSE (Rabosky & Goldberg, 2017), that does not depend on an  
359 assumed model structure and is robust to false inferences of trait-dependent evolution given a  
360 range of underlying complex evolutionary dynamics. FiSSE is limited to testing speciation  
361 rate differences it does not directly test for diversification rate differences. However, many  
362 (but not all) hypotheses for why diversification rate could vary with latitude are based on  
363 mechanisms acting on speciation rate (e.g. out-of-the-tropics model is one), so it is a partial  
364 test of the broader Diversification Rate Hypothesis.

365  
366 *BAMM implementation:* We estimated net-diversification, speciation, and extinction rates  
367 through time for the inferred *Pheidole* tree using the program BAMM V2.5. The initial values  
368 for speciation rate, rate shift, and extinction rate were estimated using the setBAMMpriors  
369 function from the R package BAMMtools (Rabosky *et al.*, 2014) and specified in the BAMM  
370 control file. Specifically, a total of  $2 \times 10^8$  generations of rjMCMC searches with samples  
371 stored every 8000 generations were performed using speciation-extinction. A total of 1000  
372 post burnin samples (50%) were retained. We performed two BAMM runs for each of three  
373 assumptions about sampling completeness (L, M, H) accounted for by changing the  
374 GlobalSamplingFraction parameter (0.3, 0.22, 0.18, respectively) (see Supplemental  
375 Information for justification). To account for potential oversampling of Nearctic species, we  
376 performed a series of runs where we lowered the number of Nearctic species by randomly  
377 pruning 21 (of total 48) Nearctic tips from the tree ten times and performed a BAMM run on  
378 each replicate, using the M assumption for the GlobalSamplingFraction parameter.

379 Using the posteriors generated from these MCMC runs, we sought to 1) explore the  
380 overall pattern of *Pheidole* diversification, 2) assess whether there is evidence of diversity

381 regulation, particularly decelerating diversification over time and after colonization of new  
382 areas, and 3) test for latitudinal dependency in diversification rate while accounting for  
383 phylogenetic non-independence. We visualized the lineage specific diversification with the  
384 `plot.bammdata` function from BMMtools, and the time plot of clade-specific diversification  
385 rate was plotted with the `plotRateThroughTime` function. We used STRAPP (e.g. the  
386 `traitDependentBMM` function in BMMtools) to test for significance of any latitude-  
387 diversification correlations. We tested for diversification rate vs. either tropicality index or  
388 absolute midpoint latitude (one-tailed, 10000 iterations, Spearman's rho as test statistic). We  
389 also checked whether our results were robust to using Pearson correlation as test statistic or  
390 coding latitude as a binary variable and using Mann-Whitney test (tropicality>0 or  
391 tropicality<0).

392

393 *HiSSE Implementation:* The HiSSE approach (Beaulieu & O'Meara, 2016) extends the  
394 BiSSE (Binary State Speciation and Extinction model) (Maddison *et al.*, 2007) framework  
395 with two advances. First, the HiSSE model itself allows for more complex models in which  
396 macroevolutionary rates can be the function of the focal trait and a hidden state. Thus, if our  
397 focal character has states 1 and 0 (in our case tropical and extratropical), there could be an  
398 influence of a second unobserved character (with states A and B) on a macroevolutionary  
399 rates lambda and mu ( $\lambda_{0A}$ ,  $\lambda_{0B}$ ,  $\lambda_{1A}$ ,  $\lambda_{1B}$ ). Second, importantly, it allows the fitting of null  
400 character-independent models (CID) in which a hidden factor(s) drives diversification rate  
401 changes without the influence of the focal trait under investigation. This allows trait-  
402 dependent BiSSE models to be compared to a character-independent model of similar  
403 complexity (CID-2, with two hidden states A and B) and more complicated HiSSE models to  
404 be compared to models of similar complexity (CID-4, with four hidden states A, B, C, D).  
405 BiSSE (trait dependent speciation-extinction), HiSSE (trait-dependent speciation/extinction  
406 with hidden states that also affect speciation/extinction) and CID (trait-independent models  
407 with hidden states that affect speciation/extinction) are best used together and models with all  
408 structures can be compared.

409 We fit a range of models with increasing complexity, starting with the BiSSE family  
410 of models under the following sets of constraints on the parameters: all diversification and  
411 transition rates equal among states, diversification equal but transition rates different (i.e.  
412 speciation and or extinction changes with latitude, but transition rates among temperate and  
413 tropical are equal), diversification different but transition rates equal (i.e. speciation and

414 extinction vary with state, but transition rates are equal), or all rates free unconstrained to  
415 vary with state (the full BiSSE model).

416 The HiSSE models allow speciation/extinction/transition rates to vary with the focal  
417 trait and also among two hidden traits. One question in implementing HiSSE is how to set the  
418 transition parameters among states (combination of observed 0/1 and hidden A/B states, with  
419 combined state space 0A, 1A, 0B, 1B). We followed suggestions of the authors of the method  
420 (Beaulieu & O'Meara, 2016), either setting all transition rates to be equal, or assumed a three  
421 parameter rates in which transitions between the observed states could vary but transitions  
422 between hidden states is a single parameter.

423 The CID-2 and CID-4 models are fit including 2 or 4 hidden states, respectively, but  
424 with no dependence on the observed traits. The CID-2 is a null model of similar complexity  
425 to the full BiSSE model, and the CID-4 is a null model of similar complexity to the HiSSE  
426 model. For these, we also assumed alternatively a single rate for all state transitions  
427 (observed and hidden) or a three-rate model including two rates for transitions between the  
428 observed states and one between all hidden states.

429 We implemented all of the above analyses using functions in the R package *hisse*  
430 (Beaulieu & O'Meara, 2016). As with the BAMM analysis, we ran all models using either the  
431 (L, M, H) assumptions about sampling completeness, and for the global *Pheidole* and New  
432 World only. For the New World analyses, we additionally adjusted the sampling fraction  
433 ( $M^*$ ) to account for possible undersampling of tropical species relative to extratropical  
434 species. As the ML optimization does not always find the global minimum from a single  
435 starting point, we ran 20 ML searches for each model using random starting parameters  
436 chosen from a uniform distribution on the interval (0,1). For all the models above, we ran  
437 them alternatively assuming a fixed root in the tropical state, or root probability estimated  
438 with the default “madwitz” method based on the data. As we found the results were  
439 insensitive to the root method, we only present results with the default option. After all  
440 BiSSE, HiSSE, and CID models were inferred, we compared all models with Akaike’s  
441 Information Criterion (AICc) scores.

442

443 *FiSSE Approach:* FiSSE (Rabosky & Goldberg, 2017) is a nonparametric test for trait-  
444 dependent speciation rates that does not assume an underlying model structure, but rather  
445 depends on distributions of branch lengths in the different states. FiSSE is complementary to  
446 the BiSSE and is robust to Type-I error. We performed both one-tailed and two-tailed tests of  
447 FiSSE to test for speciation differences between temperate and tropical taxa, using the global



448 *Pheidole* and only the New World *Pheidole*. We also performed FiSSE on a set of trees for  
449 the New World only where temperate species were thinned to account for possible  
450 undersampling of the tropics (see supplemental).

451  
452 *Phylogenetic niche conservatism*: We performed additional analyses to evaluate the degree to  
453 which latitudinal affinity is conserved in *Pheidole*. For this, we first calculated two measures  
454 of phylogenetic signal—Blomberg’s K (Blomberg *et al.*, 2003) and Pagel’s lambda (Pagel,  
455 1999)—treating absolute latitudinal midpoint as a continuous trait, using the `phylosig()`  
456 function in the R package *phytools* (Revell, 2012). Second, to estimate the overall  
457 evolutionary rates, we fit models of discrete character evolution (treating latitudinal affinity  
458 as a binary variable) using the `fitDiscrete()` function in the R package *geiger* (Pennell *et al.*,  
459 2014). To visualize the evolution of latitudinal affinity, we performed 100 stochastic  
460 character maps on the empirical tree using the `make.simmap()` function, and plotted a  
461 summary of state probabilities with the function `densityMap()`, both from the *phytools*  
462 package. Finally, to estimate whether the inferred rate of evolution combined with tropical  
463 ancestral state is consistent with the observed richness difference even in the absence of  
464 diversity regulation and diversification rate differences, we simulated niche evolution on the  
465 empirical tree and maximum likelihood model with the `sim.history()` function from *phytools*.  
466 While tree shape and trait state are not necessarily independent (i.e. the dependent model is  
467 implemented in the HiSSE analysis), this analysis asks whether we would be likely to  
468 observe a gradient even if they were independent, given that *Pheidole* likely has a tropical  
469 ancestor and given the rate that latitudinal affinity evolves. *Pheidole* likely has a tropical  
470 ancestor as the most basal *Pheidole* species, *P. fimbriata*, and the sister lineage of *Pheidole*,  
471 *Cephalotes* + *Procryptocerus*, are tropical (Moreau, 2008; Ward *et al.*, 2015).

472

## 473 RESULTS

474 *Pheidole* exhibits a latitudinal diversity gradient that is overall similar to ants as a  
475 whole (Fig. 1). The BEAST analysis inferred a phylogeny whose major features are  
476 consistent with previous studies (Figs. 2, S1). The crown age of the group (i.e. the mrca of  
477 *Pheidole fimbriata* with the rest of *Pheidole*) is inferred here to be younger than in a previous  
478 study (~29mya vs. ~37mya in Economo *et al.*, 2015a), although closer to the crown age  
479 inferred in other recent broader scale phylogenies (Ward *et al.*, 2015).



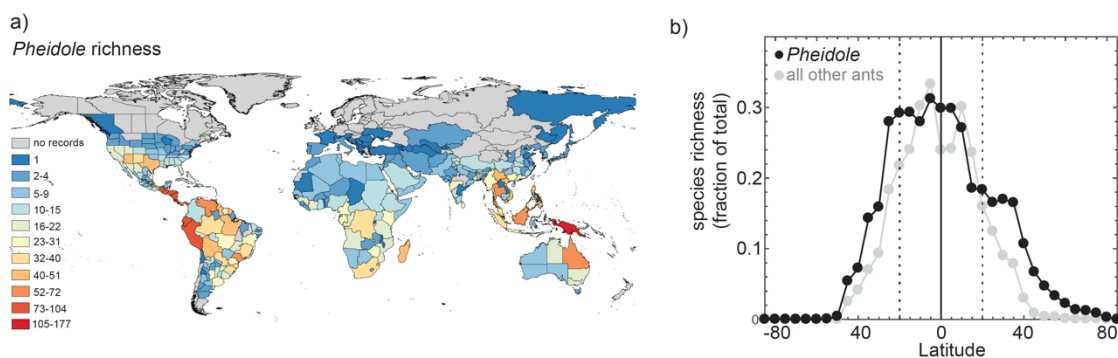

**Figure 1** : Global patterns of *Pheidole* species richness plotted by a) geographic region and b) 5-degree latitudinal band for 1138 described species/subspecies and 361 morphospecies. For comparison, latitudinal distribution of 13771 ant species excluding *Pheidole* are also depicted. Latitudinal richness is expressed as fraction of total richness (either 1499 or 13,771 for *Pheidole* or all other ants, respectively).

480

481 According to the BAMM analysis, the hyperdiversification of *Pheidole* began after an  
482 acceleration approximately 15-16 mya, and all species except for two basal lineages (*P.*  
483 *fimbriata* and *P. rhea*) are descended from this lineage. Diversification initially occurred in  
484 the New World, exhibiting a decelerating trend over time. Around 13mya, a single lineage  
485 colonized the Old World and this was associated with another burst of diversification  
486 followed by a slowdown in a clade encompassing Asia and Africa. Madagascar and Australia-  
487 NG were later colonized, followed by accelerations and subsequent decelerations in each  
488 clade (Figs. 2, S1, S2). There were several other accelerations that were not obviously  
489 associated with geographic transitions, including one clade in the new world and the  
490 *megacephala* group in Afrotropics. This general pattern of sequential colonization-  
491 acceleration-deceleration pattern is robust to changing the sampling fraction parameter,  
492 although as one would expect the inferred degree of deceleration becomes less pronounced if  
493 one assumes that more species are left to be sampled.

494 The extratropical lineages generally belong to young clades nested within larger  
495 tropical clades (Figs. 2, S1). While diversification rate varies across the genus to a degree, we  
496 could not detect a significant correlation (assessed with STRAPP) between BAMM-inferred  
497 net diversification rate and either absolute midpoint latitude or tropicity index across any of  
498 the analyses we performed (Fig. 3). These results were similar across variation in the  
499 assumed global sampling fractions, whether we calculated correlations for individual clades  
500 or the whole tree, and including trees where Nearctic species were culled to account for  
501 possible uneven sampling. Although significance tests were one-tailed for higher  
502 diversification in the tropics, we also note that none of the observed correlation coefficients  
503 were outside the null range in either direction.

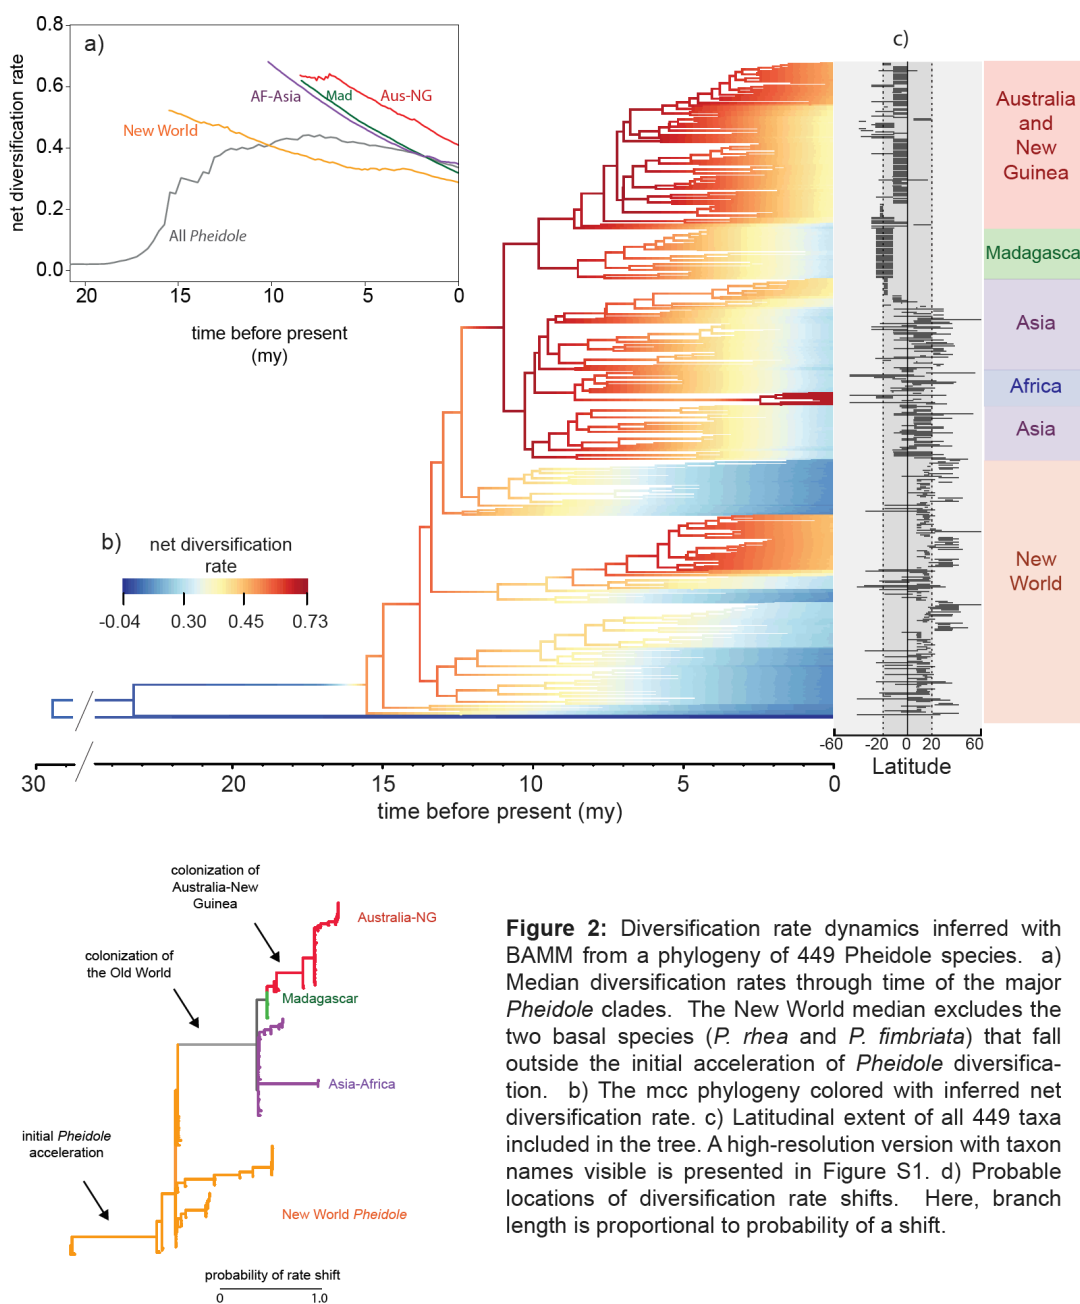

**Figure 2:** Diversification rate dynamics inferred with BAMM from a phylogeny of 449 *Pheidole* species. a) Median diversification rates through time of the major *Pheidole* clades. The New World median excludes the two basal species (*P. rhea* and *P. fimbriata*) that fall outside the initial acceleration of *Pheidole* diversification. b) The MCC phylogeny colored with inferred net diversification rate. c) Latitudinal extent of all 449 taxa included in the tree. A high-resolution version with taxon names visible is presented in Figure S1. d) Probable locations of diversification rate shifts. Here, branch length is proportional to probability of a shift.

504

505 The HiSSE analysis was also broadly consistent with BAMM analysis in finding no  
 506 statistical support for a correlation between macroevolutionary rates and latitude. In general,  
 507 the CID-2 trait-independent null model outperformed the BiSSE trait-dependent models, and  
 508 the CID-4 null outperformed the HiSSE trait-dependent models, and the CID-4 models had  
 509 the global minimum AICc across the different permutations of the analysis (Table 1). Thus,  
 510 this analysis provided no evidence for latitude-dependent macroevolution in this genus. It is  
 511 worth noting as well that the AIC-minimizing versions of BiSSE and HiSSE models, which  
 512 again were themselves not preferred over the null models, generally did not support higher

513 diversification rate in the tropics. The BiSSE model detected a slightly higher diversification  
 514 rate in the extratropical zone and the HiSSE model either fit models where tropical  
 515 diversification was higher than extratropical while in one hidden state and lower in the other  
 516 hidden state, or where the extratropical diversification was always higher in both hidden  
 517 states. For the New World, use of the sampling effort correction removed this slight, and non-  
 518 significant difference. The GeoSSE analysis, presented in the supplement, showed overall  
 519 similar results to BiSSE, a positive latitude-diversification rate trend in the New World, but  
 520 not global, *Pheidole* that is not robust to the correction for latitudinal undersampling, with  
 521 some differences in the dispersal pattern inferred probably due to differences the way  
 522 geographic states are coded. We can only assume that if a CID-like null model were available  
 523 for GeoSSE, it would also perform better than GeoSSE as it did for BiSSE.

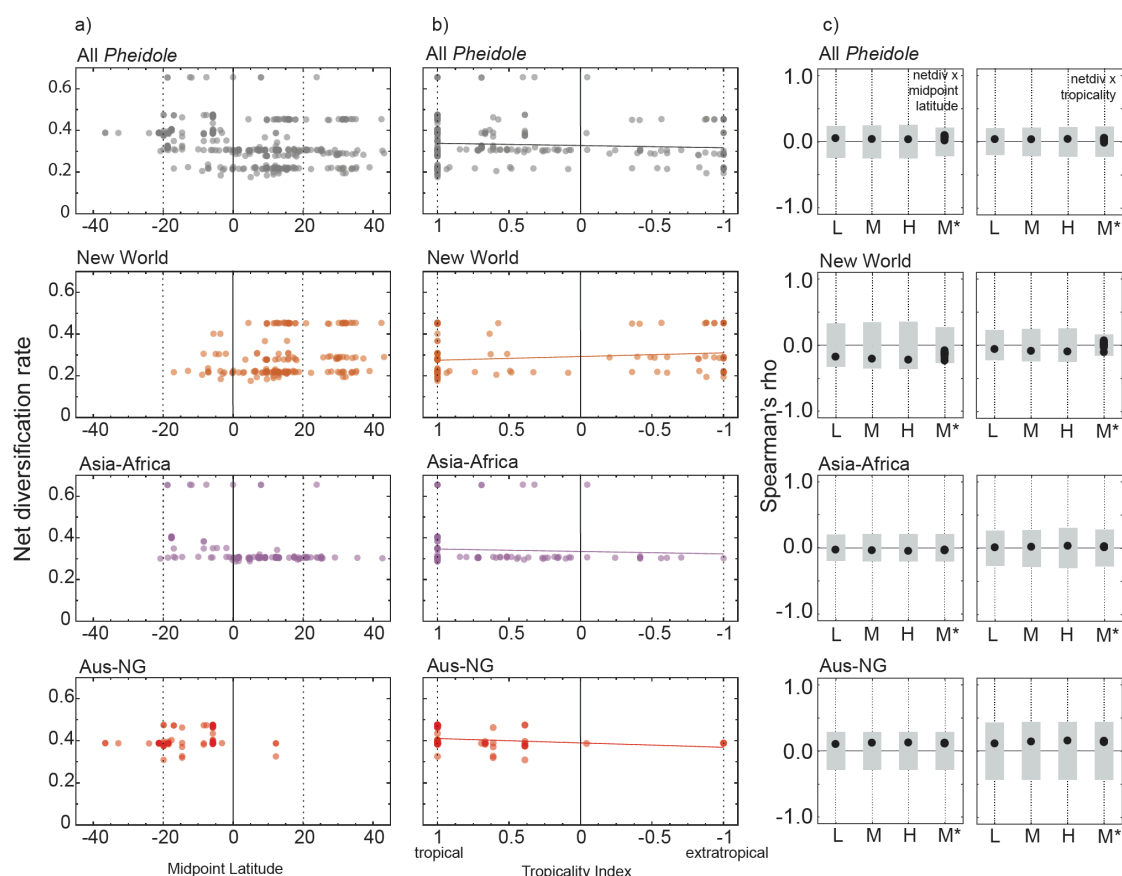

**Figure 3:** Net diversification rate inferred with BAMM as a function of latitude. Diversification rate of each *Pheidole* species (present day) inferred with BAMM using the “M” assumption of sampling completeness per species a) as a function of latitudinal midpoint and b) tropicality index, which varies from -1 for a species with a range located completely outside the tropics to 1 for a species confined to the tropics. c) Spearman correlations (black dots) for net diversification and either absolute midpoint latitude (left) or tropicality (right), where the grey boxes reflect 95% null distribution generated with STRAPP. L, M, H, reflect different assumptions about unsampled species (low, medium, high estimates of total numbers of *Pheidole*), while M\* are 10 trees where temperate species have been culled to account for possible sampling bias (see methods).

524

525

The FiSSE analysis was also consistent with the other analyses in showing no

526 correlation between speciation rate and latitude for the global *Pheidole* ( $\lambda_{temp}=0.28$ ,  
 527  $\lambda_{trop}=0.27$ , two tailed  $p>0.88$ ), but a positive speciation-latitude correlation for the New  
 528 World alone ( $\lambda_{temp}=0.30$ ,  $\lambda_{trop}=0.20$ , two-tailed  $p<0.026$ ). However, when we dropped  
 529 extratropical tips from the phylogeny to simulate potential latitudinal undersampling of the  
 530 tropics, this difference was much more modest and no longer significant ( $n=10$ , mean  
 531  $\lambda_{temp}=0.24$ , S.E.=0.005, mean  $\lambda_{trop}=0.20$ , S.E. = 0.0002, p range: 0.19-0.72 among replicates).  
 532

**Table 1:** Summary of delta AICc from the BiSSE and HiSSE trait-dependent models, and the two null models, CID-2 and CID-4. CID-2 is similar in model complexity to the BiSSE model, while CID-4 is similar in model complexity to the HiSSE model. The models were run with different parameter constraints listed below. The L, M, H, refer to the low, medium, and high estimates of missing taxa. M\* includes a correction for possible oversampling with latitude. The AICc minimizing model for each analysis is highlighted in bold.

| Model      | Description/constraint                                                      | Global <i>Pheidole</i><br>( $\Delta AICc$ ) |            |            | New World <i>Pheidole</i><br>( $\Delta AICc$ ) |            |            |            |
|------------|-----------------------------------------------------------------------------|---------------------------------------------|------------|------------|------------------------------------------------|------------|------------|------------|
|            |                                                                             | L                                           | M          | H          | L                                              | M          | H          | M*         |
| BiSSE      | Div. rates and transition rates equal across latitudes                      | 69.9                                        | 67.4       | 69.6       | 18.3                                           | 23.2       | 27.8       | 23.2       |
| BiSSE      | Div. rates equal, transition rates vary with latitude                       | 69.4                                        | 66.9       | 69.2       | 19.4                                           | 24.2       | 28.9       | 22.3       |
| BiSSE      | Div rates vary, transition rates equal with latitude                        | 69.9                                        | 67.4       | 69.6       | 18.3                                           | 23.2       | 27.8       | 23.2       |
| BiSSE      | Div. rates and transition rates vary with latitude (full BiSSE model)       | 73.5                                        | 71.1       | 73.3       | 11.6                                           | 16.1       | 18.9       | 23.2       |
| CID-2 null | 2 hidden states, 1 transition parameter                                     | 33.9                                        | 21.9       | 17.3       | 0.5                                            | 2.8        | 5.7        | 2.9        |
| CID-2 null | 2 hidden states, 3 transition parameters                                    | 21.2                                        | 20.1       | 19.4       | 2.4                                            | 5.3        | 8.6        | 4.5        |
| HiSSE      | Div rates vary with latitude and two hidden states, 1 transition parameter  | 36.1                                        | 21.1       | 16.5       | 0.9                                            | 0.9        | 0.3        | 8.6        |
| HiSSE      | Div rates vary with latitude and two hidden states, 3 transition parameters | 22.5                                        | 28.0       | 27.7       | 0.2                                            | 2.0        | 2.3        | 9.5        |
| CID-4 null | Div rates vary with four hidden states, 1 transition parameter              | 22.5                                        | 11.1       | 4.6        | 1.6                                            | <b>0.0</b> | <b>0.0</b> | <b>0.0</b> |
| CID-4 null | Div. rates vary with four hidden states, 3 transition parameters            | <b>0.0</b>                                  | <b>0.0</b> | <b>0.0</b> | <b>0.0</b>                                     | 1.1        | 0.4        | 5.7        |

533

534

535 The extratropical lineages are clustered with each other on the tree, although it is clear  
 536 there were numerous transitions out of the tropics (Fig. 4). The tests for phylogenetic signal  
 537 in latitudinal affinity for Blomberg's K ( $K=0.34$ ,  $p<0.002$ ) and Pagel's lambda ( $\lambda=0.95$ ,  $p<10^{-57}$ )  
 538 were both highly significant. Symmetric and asymmetric models of discrete character  
 539 evolution both fit the data comparably well (symmetric model  $q_{trop \rightarrow etrop} = q_{etrop \rightarrow trop} = 0.015$ ,

540 AICc=235.5, asymmetric model  $q_{trop \rightarrow etrop} = 0.013$ ,  $q_{etrop \rightarrow trop} = 0.060$ , AICc=234.9).  
541 Simulations of character evolution on the empirical phylogeny show that a latitudinal  
542 gradient is the most common outcome if one assumes a tropical ancestor and either model for  
543 the inferred rate of evolution of latitudinal affinity (Fig. 4).

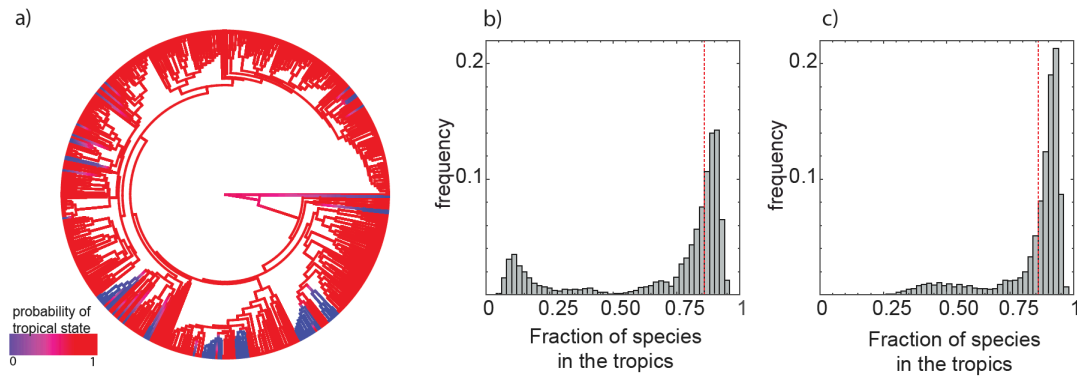

**Figure 4** : Evolution of latitudinal affinity in *Pheidole*. a) Branch-wise probability of ancestral tropical state inferred from stochastic character mapping. b-c) Histograms of latitudinal richness differences between tropics and extratropics simulated with stochastic character mapping on the empirical phylogeny assuming a tropical ancestor and the inferred degree of niche conservatism using symmetric (b) or asymmetric (c) models of character evolution. The vertical dashed line is the empirical richness fraction.

544

545

## 546 DISCUSSION

547 Our analysis of *Pheidole* macroevolution sheds light on the mechanisms responsible  
548 for the evolution of the latitudinal diversity gradient in ants. By focusing on the recent  
549 evolutionary dynamics of a single large radiation, our study complements taxon-wide studies  
550 that focus on differences among highly divergent clades and deeper timescales (e.g. Cardillo  
551 *et al.*, 2005; Weir & Schluter, 2007; Jetz *et al.*, 2012; Pyron & Wiens, 2013; Rolland *et al.*,  
552 2014; Kerkhoff *et al.* 2014, Duchêne & Cardillo, 2015; Economo *et al.* In Press).

553 We find no evidence of higher diversification rate for tropical *Pheidole* lineages  
554 across any of our analyses (Figs. 2-4, S1), as would be predicted by the Diversification Rate  
555 Hypothesis. In general, the signal of latitude as a trait affecting macroevolutionary rates in the  
556 BAMM, HiSSE, and FiSSE analyses was weak to non-existent. When there was some hint of  
557 a correlation, for example in the best fitting (but still not better than null) HiSSE/BiSSE  
558 analyses, and the FiSSE analysis for New World speciation rate uncorrected for latitudinal  
559 sampling bias, it was in the direction of higher diversification/speciation in the temperate  
560 zone. However, those correlations were not robust to reasonable assumptions about

561 undersampling in the tropics, thus the overall picture is a lack of evidence for latitudinal  
562 dependency for macroevolutionary rates.

563 We do not view our analysis as ruling out that such systematic macroevolution-  
564 latitude relationships may exist, even in *Pheidole*. Rather, our analysis only suggests that  
565 such relationships are not the causal factor in the gradient. The Diversification Rate  
566 Hypothesis is predicated on the fact that lineages reach different latitudes early on in their  
567 evolution, but the disparity of richness is due to different accumulation rates over time. If  
568 niche conservatism is too high for lineages to evolve out of the tropics (or vice versa) early  
569 on in the radiation, there may be no chance for any latitude-macroevolutionary rate  
570 correlations to manifest and be statistically detectable. Thus, we view our analysis as stronger  
571 evidence that a diversification rate- latitude correlation is not causal in the latitudinal gradient  
572 in *Pheidole*, rather than showing that no such relationship exists in *Pheidole* which could  
573 affect biodiversity patterns under the right conditions.

574 While there is no evidence for relationship between diversification rate and latitude,  
575 the pattern of diversification suggests *Pheidole* evolution is being shaped by diversity  
576 regulation. Even if one assumes that there are over 1300 undescribed *Pheidole* species (the  
577 higher end of our estimated range) in addition to the 1175 currently described species, our  
578 analysis found that diversification is still decelerating in the genus. Moreover, there is  
579 evidence that diversification accelerated after colonization of new areas, specifically when  
580 *Pheidole* colonized the Old World, and again after it colonized Australia and New Guinea.  
581 This lends further support to the idea that there are ecological limits to *Pheidole* diversity,  
582 because when new continents are colonized, ecological opportunity is high. However, it is  
583 more difficult to determine if these limits vary with latitude in a way that is causally  
584 responsible for the richness gradient. For example, the limits to diversity could be similar at  
585 all latitudes, but phylogenetic conservatism could be causing the higher latitudes to lag  
586 behind tropical latitudes in reaching their steady state. Here we might expect a positive trend  
587 of *Pheidole* diversification rate running counter to the richness gradient, because temperate  
588 zones would be further from the equilibrium number of species. While there were some hints  
589 of a positive latitude-diversification correlation (e.g. Supplemental Fig. S2), there was not a  
590 robust and statistically supported relationship. A future direction would be to examine how  
591 niche overlap and coexistence in *Pheidole* varies with latitude or energetic constraints, as has  
592 been pursued in better studied taxa such as birds (Pigot *et al.*, 2016).

593 Overall, the results match the predictions of the tropical conservatism hypothesis  
594 (TCH). We found that latitudinal affinity is moderately conserved in *Pheidole*. While there



595 have been a number of transitions from the tropics to the temperate zone, latitudinal affinity  
596 evolves slowly enough to make a richness gradient the most likely outcome simply due its  
597 tropical ancestry and phylogenetic inertia. Thus, our study joints a series of recent studies  
598 supporting the TCH for woody plants (Kerkhoff *et al.*, 2014), birds (Duchêne & Cardillo,  
599 2015), mammals (Buckley *et al.*, 2010), and butterflies (Hawkins & DeVries, 2009).

600         These results for *Pheidole* evolution over the last 30my connect well to results on ant  
601 diversification on deeper timescales (Economo, In Press), and together tell a coherent story  
602 about the evolution of latitudinal gradients in ants. Most ant lineages older than 34mya are  
603 reconstructed to be tropical, including the *Pheidole* stem lineage. Around 15 mya, *Pheidole*  
604 exhibited a many-fold acceleration in diversification rate and began a massive radiation. The  
605 reason for this initial acceleration, such as evolution of a key innovation, remains unknown. It  
606 took time for some *Pheidole* lineages to evolve the requisite traits for colonization of high  
607 latitudes. Once colonization of cold biomes occurred, diversification was not detectibly  
608 slower. In their analysis across all ant clades, Economo et al. (In Press) also found no  
609 evidence for elevated net diversification rates among clades centered in the tropics relative to  
610 those in the temperate zone, although clades are quite heterogeneous in rate, probably due to  
611 other latent biological and historical differences. It remained possible that diversification rate  
612 is correlated with latitude within the large clades, but biological differences among clades  
613 obscured this pattern. Within *Pheidole*, diversification rate is much less heterogeneous, but  
614 there is still no evidence of a negative latitudinal correlation, implying that lack of  
615 phylogenetic resolution within large clades was not hiding this relationship in the previous  
616 analysis (Economo et al. *In Press*). *Pheidole* provides additional insight that diversity  
617 regulation is a prominent feature of the global evolution of the genus, although it is unclear if  
618 it is a causal factor in the gradient. Finally, since we have a better handle on sampling biases  
619 within *Pheidole* than we do for ants as a whole, we can be more confident that latitudinal  
620 sampling biases are not masking latitudinal diversification rate variation.

621         While thus far the evidence is consistent with both phylogenetic niche conservatism  
622 (TCH) and diversity regulation (ERH) playing a role in *Pheidole* diversification, determining  
623 whether one alone or both together are responsible for the diversity gradient remains a  
624 challenge for future work. Moreover, as these are “umbrella” hypotheses, each individual  
625 hypothesis could encompass a range of different mechanisms. One way forward is a  
626 hierarchical, systematic approach, where broad categories of hypotheses are evaluated (e.g.  
627 like these in this study), followed then by more targeted studies devised to tease apart the  
628 mechanisms within the larger classes of hypothesis that fit the data well. We also agree with



629 the approach advocated by Hurlbert and Stegen (Hurlbert & Stegen, 2014a), toward a  
630 quantitative formulation of multiple competing and intersecting hypotheses, combined with a  
631 simulation-based approach to identify their key predictions. We felt initial efforts in this  
632 direction were not yet mature enough to use as a basis for the current study, but look forward  
633 to further development of the approach in the future. Finally, we need further work to resolve  
634 and analyze other hyperdiverse ant radiations (e.g. *Camponotus*, *Strumigenys*, *Tetramorium*)  
635 that also exhibit strong latitudinal gradients.

636         Despite the high level of research effort directed toward understanding the latitudinal  
637 gradient, the matter is far from resolved (Mittelbach *et al.*, 2007). Studies have differed in  
638 their conclusions about the origins of the gradient, probably due to both differences in  
639 conceptual and methodological approaches and real variation in process and history across  
640 taxonomic groups. The former should continue to improve as we develop more penetrating  
641 quantitative methods that make use of more diverse data types. Variability across taxonomic  
642 groups is best assessed and understood by examining more of them. The vast majority of  
643 studies on the diversity gradient have focused on vertebrates. While of obvious intrinsic  
644 interest, vertebrates may not be good surrogates for understanding general patterns across the  
645 rest of the tree of life. For example, mammals have been impacted by human activities so  
646 dramatically that it can affect large-scale macroecological patterns (Turvey & Fritz, 2011;  
647 Santini, 2017). With development of global invertebrate datasets like the one analyzed here,  
648 we stand to broaden our perspective on large-scale biological patterns and their origins.

649

650

651

652

653 **REFERENCES:**

654

655 Beaulieu, J.M. & O'Meara, B.C. (2016) Detecting Hidden Diversification Shifts in Models of  
656 Trait-Dependent Speciation and Extinction. *Systematic Biology*, **65**, 583-601.

657 Blanchard, B.D. & Moreau, C.S. (2017) Defensive traits exhibit an evolutionary trade-off and  
658 drive diversification in ants. *Evolution*, **71**, 315-328.

659 Blomberg, S.P., Garland, T. & Ives, A.R. (2003) Testing for phylogenetic signal in  
660 comparative data: Behavioral traits are more labile. *Evolution*, **57**, 717-745.

661 Bouckaert, R., Heled, J., Kuhnert, D., Vaughan, T., Wu, C.H., Xie, D., Suchard, M.A.,  
662 Rambaut, A. & Drummond, A.J. (2014) BEAST 2: a software platform for Bayesian  
663 evolutionary analysis. *PLoS Comput Biol*, **10**, e1003537.

664 Brady, S.G., Schultz, T.R., Fisher, B.L. & Ward, P.S. (2006) Evaluating alternative  
665 hypotheses for the early evolution and diversification of ants. *Proceedings of the*  
666 *National Academy of Sciences*, **103**, 18172-18177.

667 Buckley, L.B. & Jetz, W. (2007) Environmental and historical constraints on global patterns  
668 of amphibian richness. *Proceedings of the Royal Society of London B: Biological*  
669 *Sciences*, **274**, 1167-1173.

670 Buckley, L.B., Davies, T.J., Ackerly, D.D., Kraft, N.J.B., Harrison, S.P., Anacker, B.L.,  
671 Cornell, H.V., Damschen, E.I., Grytnes, J.A., Hawkins, B.A., McCain, C.M.,  
672 Stephens, P.R. & Wiens, J.J. (2010) Phylogeny, niche conservatism and the latitudinal  
673 diversity gradient in mammals. *Proceedings of the Royal Society B-Biological*  
674 *Sciences*, **277**, 2131-2138.

675 Cardillo, M., Orme, C.D.L. & Owens, I.P. (2005) Testing for latitudinal bias in diversification  
676 rates: an example using New World birds. *Ecology*, **86**, 2278-2287.

677 Clark, K., Karsch-Mizrachi, I., Lipman, D.J., Ostell, J. & Sayers, E.W. (2016) GenBank.  
678 *Nucleic Acids Research*, **44**, D67-D72.

679 Condamine, F.L., Sperling, F.A.H., Wahlberg, N., Rasplus, J.Y. & Kergoat, G.J. (2012) What  
680 causes latitudinal gradients in species diversity? Evolutionary processes and  
681 ecological constraints on swallowtail biodiversity. *Ecology Letters*, **15**, 267-277.

682 Duchêne, D.A. & Cardillo, M. (2015) Phylogenetic patterns in the geographic distributions of  
683 birds support the tropical conservatism hypothesis. *Global Ecology and*  
684 *Biogeography*, **24**, 1261-1268.

685 Duchene, S., Molak, M. & Ho, S.Y.W. (2014) ClockstaR: choosing the number of relaxed-

- 686 clock models in molecular phylogenetic analysis. *Bioinformatics*, **30**, 1017-1019.
- 687 Dunn, R.R., Agosti, D., Andersen, A.N., Arnan, X., Bruhl, C.A., Cerdá, X., Ellison, A.M.,  
688 Fisher, B.L., Fitzpatrick, M.C. & Gibb, H. (2009) Climatic drivers of hemispheric  
689 asymmetry in global patterns of ant species richness. *Ecology letters*, **12**, 324-333.
- 690 Economo, E.P., Klimov, P., Sarnat, E.M., Guenard, B., Weiser, M.D., Lecroq, B. & Knowles,  
691 L.L. (2015a) Global phylogenetic structure of the hyperdiverse ant genus *Pheidole*  
692 reveals the repeated evolution of macroecological patterns. *Proceedings of the Royal*  
693 *Society B-Biological Sciences*, **282**
- 694 Economo, E.P., Sarnat, E.M., Janda, M., Clouse, R., Klimov, P.B., Fischer, G., Blanchard,  
695 B.D., Ramirez, L.N., Andersen, A.N., Berman, M., Guenard, B., Lucky, A., Rabeling,  
696 C., Wilson, E.O. & Knowles, L.L. (2015b) Breaking out of biogeographical modules:  
697 range expansion and taxon cycles in the hyperdiverse ant genus *Pheidole*. *Journal of*  
698 *Biogeography*, **42**, 2289-2301.
- 699 Economo, E.P., Narula, N., Friedman, N. R., Weiser, M. D., Guénard, B. (In Press)  
700 Macroecology and macroevolution of the latitudinal diversity gradient in ants. *Nature*  
701 *Communications*.
- 702 Fine, P.V.A. (2015) Ecological and Evolutionary Drivers of Geographic Variation in Species  
703 Diversity. *Annual Review of Ecology, Evolution, and Systematics*, **46**, 369-392.
- 704 FitzJohn, R.G. (2010) Quantitative Traits and Diversification. *Systematic Biology*, **59**, 619-  
705 633.
- 706 Folmer, O., Black, M., Hoeh, W., Lutz, R. & Vrijenhoek, R. (1994) DNA primers for  
707 amplification of mitochondrial cytochrome c oxidase subunit I from diverse metazoan  
708 invertebrates. *Mol Mar Biol Biotechnol*, **3**, 294-9.
- 709 Goldberg, E.E., Lancaster, L.T. & Ree, R.H. (2011) Phylogenetic Inference of Reciprocal  
710 Effects between Geographic Range Evolution and Diversification. *Systematic*  
711 *Biology*, **60**, 451-465.
- 712 Guénard, B., Perrichot, V. & Economo, E.P. (2015) Integration of global fossil and modern  
713 biodiversity data reveals dynamism and stasis in ant macroecological patterns.  
714 *Journal of Biogeography*, **42**, 2302-2312.
- 715 Guénard, B., Weiser, M.D., Gomez, K., Narula, N. & Economo, E.P. (2017) The Global Ant  
716 Biodiversity Informatics (GABI) database: synthesizing data on the geographic  
717 distribution of ant species (Hymenoptera: Formicidae). *Myrmecological News*, **24**, 83-  
718 89.
- 719 Hawkins, B.A. & DeVries, P.J. (2009) Tropical niche conservatism and the species richness

- 720 gradient of North American butterflies. *Journal of Biogeography*, **36**, 1698-1711.
- 721 Hurlbert, A.H. & Stegen, J.C. (2014a) On the processes generating latitudinal richness  
722 gradients: identifying diagnostic patterns and predictions. *Frontiers in Genetics*, **5**
- 723 Hurlbert, A.H. & Stegen, J.C. (2014b) When should species richness be energy limited, and  
724 how would we know? *Ecology Letters*, **17**, 401-413.
- 725 Jablonski, D., Roy, K. & Valentine, J.W. (2006) Out of the tropics: Evolutionary dynamics of  
726 the latitudinal diversity gradient. *Science*, **314**, 102-106.
- 727 Janicki, J., Narula, N., Ziegler, M., Guenard, B. & Economo, E.P. (2016) Visualizing and  
728 interacting with large-volume biodiversity data using client-server web-mapping  
729 applications: The design and implementation of antmaps.org. *Ecological Informatics*,  
730 **32**, 185-193.
- 731 Jetz, W., Thomas, G.H., Joy, J.B., Hartmann, K. & Mooers, A.O. (2012) The global diversity  
732 of birds in space and time. *Nature*, **491**, 444-448.
- 733 Kaspari, M., Ward, P.S. & Yuan, M. (2004) Energy gradients and the geographic distribution  
734 of local ant diversity. *Oecologia*, **140**, 407-413.
- 735 Katoh, K. & Standley, D.M. (2013) MAFFT Multiple Sequence Alignment Software Version  
736 7: Improvements in Performance and Usability. *Molecular Biology and Evolution*, **30**,  
737 772-780.
- 738 Kerkhoff, A.J., Moriarty, P.E. & Weiser, M.D. (2014) The latitudinal species richness gradient  
739 in New World woody angiosperms is consistent with the tropical conservatism  
740 hypothesis. *Proceedings of the National Academy of Sciences of the United States of*  
741 *America*, **111**, 8125-8130.
- 742 Lanfear, R., Calcott, B., Ho, S.Y.W. & Guindon, S. (2012) PartitionFinder: Combined  
743 Selection of Partitioning Schemes and Substitution Models for Phylogenetic  
744 Analyses. *Molecular Biology and Evolution*, **29**, 1695-1701.
- 745 Losos, J.B. (2008) Phylogenetic niche conservatism, phylogenetic signal and the relationship  
746 between phylogenetic relatedness and ecological similarity among species. *Ecology*  
747 *letters*, **11**, 995-1003.
- 748 Maddison, W.P., Midford, P.E. & Otto, S.P. (2007) Estimating a binary character's effect on  
749 speciation and extinction. *Systematic Biology*, **56**, 701-710.
- 750 McKenna, D.D. & Farrell, B.D. (2006) Tropical forests are both evolutionary cradles and  
751 museums of leaf beetle diversity. *Proceedings of the National Academy of Sciences*,  
752 **103**, 10947-10951.
- 753 Mittelbach, G.G., Schemske, D.W., Cornell, H.V., Allen, A.P., Brown, J.M., Bush, M.B.,

- 754 Harrison, S.P., Hurlbert, A.H., Knowlton, N. & Lessios, H.A. (2007) Evolution and  
755 the latitudinal diversity gradient: speciation, extinction and biogeography. *Ecology*  
756 *letters*, **10**, 315-331.
- 757 Moreau, C.S. (2008) Unraveling the evolutionary history of the hyperdiverse ant genus  
758 Pheidole (Hymenoptera : Formicidae). *Molecular Phylogenetics and Evolution*, **48**,  
759 224-239.
- 760 Moreau, C.S. & Bell, C.D. (2013) Testing the museum versus cradle tropical biological  
761 diversity hypothesis: phylogeny, diversification, and ancestral biogeographic range  
762 evolution of the ants. *Evolution*, **67**, 2240-2257.
- 763 Moreau, C.S., Bell, C.D., Vila, R., Archibald, S.B. & Pierce, N.E. (2006) Phylogeny of the  
764 ants: diversification in the age of angiosperms. *Science*, **312**, 101-104.
- 765 Owens, H.L., Lewis, D.S., Dupuis, J.R., Clamens, A.L., Sperling, F.A.H., Kawahara, A.Y.,  
766 Guralnick, R.P. & Condamine, F.L. (2017) The latitudinal diversity gradient in New  
767 World swallowtail butterflies is caused by contrasting patterns of out-of-and into-the-  
768 tropics dispersal. *Global Ecology and Biogeography*, **26**, 1447-1458.
- 769 Pagel, M. (1999) Inferring the historical patterns of biological evolution. *Nature*, **401**, 877-  
770 884.
- 771 Paradis, E., Claude, J. & Strimmer, K. (2004) APE: Analyses of Phylogenetics and Evolution  
772 in R language. *Bioinformatics*, **20**, 289-290.
- 773 Pennell, M.W., Eastman, J.M., Slater, G.J., Brown, J.W., Uyeda, J.C., FitzJohn, R.G., Alfaro,  
774 M.E. & Harmon, L.J. (2014) geiger v2.0: an expanded suite of methods for fitting  
775 macroevolutionary models to phylogenetic trees. *Bioinformatics*, **30**, 2216-2218.
- 776 Pianka, E.R. (1966) Latitudinal Gradients in Species Diversity - a Review of Concepts.  
777 *American Naturalist*, **100**, 33-&.
- 778 Pie, M.R. (2016) The macroevolution of climatic niches and its role in ant diversification.  
779 *Ecological Entomology*, **41**, 301-307.
- 780 Pigot, A.L., Tobias, J.A. & Jetz, W. (2016) Energetic Constraints on Species Coexistence in  
781 Birds. *Plos One*, **11**
- 782 Pyron, R.A. & Wiens, J.J. (2013) Large-scale phylogenetic analyses reveal the causes of high  
783 tropical amphibian diversity. *Proceedings of the Royal Society of London B:*  
784 *Biological Sciences*, **280**, 20131622.
- 785 Rabosky, D.L. (2014) Automatic detection of key innovations, rate shifts, and diversity-  
786 dependence on phylogenetic trees. *PLoS One*, **9**, e89543.
- 787 Rabosky, D.L. & Hurlbert, A.H. (2015) Species Richness at Continental Scales Is Dominated

- 788 by Ecological Limits. *American Naturalist*, **185**, 572-583.
- 789 Rabosky, D.L. & Goldberg, E.E. (2015) Model inadequacy and mistaken inferences of trait-  
790 dependent speciation. *Systematic biology*, **64**, 340-355.
- 791 Rabosky, D.L. & Huang, H. (2015) Minimal effects of latitude on present-day speciation  
792 rates in New World birds. *Proceedings of the Royal Society of London B: Biological  
793 Sciences*, **282**, 20142889.
- 794 Rabosky, D.L. & Goldberg, E.E. (2017) FiSSE: A simple nonparametric test for the effects of  
795 a binary character on lineage diversification rates. *Evolution*, **71**, 1432-1442.
- 796 Rabosky, D.L., Grundler, M., Anderson, C., Shi, J.J., Brown, J.W., Huang, H. & Larson, J.G.  
797 (2014) BAMMtools: an R package for the analysis of evolutionary dynamics on  
798 phylogenetic trees. *Methods in Ecology and Evolution*, **5**, 701-707.
- 799 Ranwez, V., Harispe, S., Delsuc, F. & Douzery, E.J.P. (2011) MACSE: Multiple Alignment of  
800 Coding SEquences Accounting for Frameshifts and Stop Codons. *Plos One*, **6**
- 801 Revell, L.J. (2012) phytools: an R package for phylogenetic comparative biology (and other  
802 things). *Methods in Ecology and Evolution*, **3**, 217-223.
- 803 Rohde, K. (1992) Latitudinal gradients in species diversity: the search for the primary cause.  
804 *Oikos*, 514-527.
- 805 Rolland, J., Condamine, F.L., Jiguet, F. & Morlon, H. (2014) Faster speciation and reduced  
806 extinction in the tropics contribute to the mammalian latitudinal diversity gradient.  
807 *PLoS Biol*, **12**, e1001775.
- 808 Santini, L., González-Suárez, M., Rondinini, C., Di Marco, M. (2017) Shifting baseline in  
809 macroecology? Unravelling the influence of human impact on mammalian body mass.  
810 *Diversity and Distributions*, **23**, 640-659.
- 811 Sarnat, E.M. & Moreau, C.S. (2011) Biogeography and morphological evolution in a Pacific  
812 island ant radiation. *Molecular Ecology*, **20**, 114-130.
- 813 Siqueira, A.C., Oliveira-Santos, L.G.R., Cowman, P.F., Floeter, S.R., Algar, A. (2016)  
814 Evolutionary processes underlying latitudinal differences in reef fish diversity. *Global  
815 Ecology and Biogeography*, **25**, 1466-1476.
- 816 Stamatakis, A. (2014) RAxML version 8: a tool for phylogenetic analysis and post-analysis  
817 of large phylogenies. *Bioinformatics*, **30**, 1312-1313.
- 818 Stephens, P.R. & Wiens, J.J. (2003) Explaining species richness from continents to  
819 communities: The time-for-speciation effect in emydid turtles. *American Naturalist*,  
820 **161**, 112-128.
- 821 Turvey, S.T. & Fritz, S.A. (2011) The ghosts of mammals past: biological and geographical



- 822 patterns of global mammalian extinction across the Holocene. *Philos Trans R Soc*  
823 *Lond B Biol Sci*, **366**, 2564-76.
- 824 Ward, P.S., Brady, S.G., Fisher, B.L. & Schultz, T.R. (2015) The evolution of myrmicine ants:  
825 phylogeny and biogeography of a hyperdiverse ant clade (Hymenoptera: Formicidae).  
826 *Systematic Entomology*, **40**, 61-81.
- 827 Weir, J.T. & Schluter, D. (2007) The latitudinal gradient in recent speciation and extinction  
828 rates of birds and mammals. *Science*, **315**, 1574-1576.
- 829 Wiens, J.J. & Donoghue, M.J. (2004) Historical biogeography, ecology and species richness.  
830 *Trends in ecology & evolution*, **19**, 639-644.
- 831 Wiens, J.J. & Graham, C.H. (2005) Niche conservatism: Integrating evolution, ecology, and  
832 conservation biology. *Annual Review of Ecology Evolution and Systematics*, **36**, 519-  
833 539.
- 834 Willig, M.R., Kaufman, D.M. & Stevens, R.D. (2003) Latitudinal gradients of biodiversity:  
835 Pattern, process, scale, and synthesis. *Annual Review of Ecology Evolution and*  
836 *Systematics*, **34**, 273-309.

837  
838

#### 839 **DATA ACCESSIBILITY**

840 Molecular sequences have been deposited to GenBank (see Table S1 for accession numbers).  
841 We have also provided the alignment, BEAST xml file, and geographic dataset in a  
842 supplemental data archive. The GABI dataset can be accessed on the interactive website  
843 [antmaps.org](http://antmaps.org).

844

845 **ACKNOWLEDGEMENTS:** This work was supported by NSF (DEB-1145989 to EPE and  
846 LLK), by subsidy funding to OIST, and by a Japan Society for the Promotion of Science  
847 Kakenhi grant to EPE. We thank P.S. Ward and B.L. Fisher for sharing specimens and for all  
848 the data contributors to the GABI project.

849

850 **BIOSKETCH:** The research team is interested in the ecology and evolution of biodiversity,  
851 especially insects.

852
